# Supplementary material
Source: Research Square preprint supplement (doi:10.21203/rs.3.rs-10065820/v1)
Supplement: Supplementary file 1 [file d51be520741dd334badf2353.pdf]

## Supplementary information

# Saharan dust exacerbates the present sensitivity of alpine glaciers to climate change

Léon Roussel<sup>1, 2, 3</sup>, Marie Dumont<sup>1, 2, 3</sup>, Marion Réveillet<sup>4, 2</sup>, Matthias Huss<sup>5, 6, 7</sup>, Pierre Nabat<sup>8, 3</sup>, Giulia Mazzotti<sup>9, 4</sup>, and Diego Monteiro<sup>1, 2, 3</sup>

<sup>1</sup>*Centre d'Études de la Neige, Centre Nationale Recherches Météorologiques (CNRM), Météo-France/CNRS, Grenoble 38000, France*

<sup>2</sup>*Université Grenoble Alpes, Grenoble 38000, France*

<sup>3</sup>*Université de Toulouse, Toulouse 31000, France*

<sup>4</sup>*Institut des Géosciences de l'Environnement (IGE, UMR 5001), CNRS/IRD/INRAE/Grenoble INP, 38400 Saint Martin d'Hères, France*

<sup>5</sup>*Laboratory of Hydraulics, Hydrology and Glaciology (VAW), ETH Zürich, Zürich, Switzerland*

<sup>6</sup>*Swiss Federal Institute for Forest, Snow and Landscape Research (WSL), Birmensdorf, Switzerland*

<sup>7</sup>*Department of Geosciences, University of Fribourg, Fribourg, Switzerland*

<sup>8</sup>*Centre Nationale Recherches Météorologiques (CNRM), Météo-France, CNRS, Toulouse 31000, France*

<sup>9</sup>*WSL Institute for Snow and Avalanche Research SLF, Davos, Switzerland*

June 15, 2026

| Abbreviation | Full glacier name | Country     | Lat, lon (°)   | Aspect | Elevation min-max <sup>a</sup> (m a.s.l.) | Area (km <sup>2</sup> ) |
|--------------|-------------------|-------------|----------------|--------|-------------------------------------------|-------------------------|
| GLB          | Glacier-Blanc     | France      | 44.942, 6.384  | NE     | 2450-4050                                 | 5                       |
| SSO          | Saint-Sorlin      | France      | 45.157, 6.159  | N      | 2700-3450                                 | 2                       |
| GEB          | Gébroulaz         | France      | 45.290, 6.631  | N      | 2600-3450                                 | 3                       |
| MDG          | Mer-de-Glace      | France      | 45.898, 6.939  | NW     | 1550-4250                                 | 35                      |
| ARG          | Argentière        | France      | 45.941, 7.004  | NW     | 1700-3560                                 | 11                      |
| FIN          | Findel            | Switzerland | 45.993, 7.875  | W      | 2600-3800                                 | 13                      |
| ALE          | Aletsch           | Switzerland | 46.485, 8.055  | SE     | 1700-4150                                 | 77                      |
| GRI          | Gries             | Switzerland | 46.431, 8.321  | E      | 2450-3350                                 | 4                       |
| RHO          | Rhône             | Switzerland | 46.621, 8.399  | S      | 2250-3600                                 | 14                      |
| CLA          | Clariden          | Switzerland | 46.838, 8.886  | SE     | 2450-3250                                 | 5                       |
| PER          | Pers-Morteratsch  | Switzerland | 46.407, 9.931  | N      | 2000-3960                                 | 15                      |
| SIL          | Silvretta         | Switzerland | 46.852, 10.079 | W      | 2450-3100                                 | 3                       |

Supplementary Table 1: **Geographic and topographic information about the 12 selected glaciers.** <sup>a</sup>Minimum and maximum elevation of each glacier based on the outlines used in this study.

| Abbr. | End-of-summer snowline elevation (m a.s.l.) <sup>a</sup> | Mean glacier-wide SMB (m w.e. yr <sup>-1</sup> ) <sup>b</sup> | Rank SMB 2020 vs. 2008-2017 | Number of stakes summer measurements <sup>d</sup> | Number of stakes winter measurements <sup>c</sup> | Sentinel-2 tile | Ice albedo from Sentinel-2 |
|-------|----------------------------------------------------------|---------------------------------------------------------------|-----------------------------|---------------------------------------------------|---------------------------------------------------|-----------------|----------------------------|
| GLB   | 3180                                                     | -1.30                                                         | 11th                        | 13-18                                             | 16-20                                             | T31TGK          | 0.22                       |
| SSO   | 2970                                                     | -1.96                                                         | 8th                         | 9-23                                              | 18-27                                             | T31TGL          | 0.23                       |
| GEB   | 3070                                                     | -1.30                                                         | 7th                         | 16-24                                             | 24-25                                             | T32TLR          | 0.25                       |
| MDG   | 3080                                                     | -1.49                                                         | 7th                         | 18-26                                             | 26-42                                             | T32TLR          | 0.22                       |
| ARG   | 2860                                                     | -1.49                                                         | 7th                         | 19-28                                             | 30-40                                             | T32TLR          | 0.23                       |
| FIN   | 3280                                                     | -1.18                                                         | 8th                         | 8-13                                              | 140-275                                           | T32TMR          | 0.26                       |
| ALE   | 3100                                                     | -1.63                                                         | 6th                         | 2-5                                               | 2-74                                              | T32TMS          | 0.22                       |
| GRI   | 2990                                                     | -1.59                                                         | 7th                         | 13-17                                             | 114-168                                           | T32TMS          | 0.21                       |
| RHO   | 2930                                                     | -1.39                                                         | 6th                         | 11-13                                             | 273-373                                           | T32TMS          | 0.25                       |
| CLA   | 2840                                                     | -1.24                                                         | 7th                         | 2-2                                               | 2-15                                              | T32TMS          | 0.23                       |
| PER   | 3070                                                     | -1.64                                                         | 8th                         | 9-11                                              | 136-168                                           | T32TNS          | 0.26                       |
| SIL   | 2810                                                     | -1.81                                                         | 5th                         | 16-18                                             | 174-198                                           | T32TNS          | 0.23                       |

Supplementary Table 2: **Glaciological information about the 12 selected glaciers.** <sup>a</sup>Mean over the period 2000-2025 using end-of-summer snowline elevation from Sommer et al. (2026). <sup>b</sup>Average of annual SMB over the period 2019-2022 from the WGMS time series of annual mass-change estimates for the world's glaciers (Dussailant et al., 2025). <sup>c</sup>Rank of the SMB of the year 2020 among the 10 years of the period 2008-2017, using also the WGMS time series. <sup>d</sup>Minimum and maximum numbers over the 4 years between 2019 and 2022.

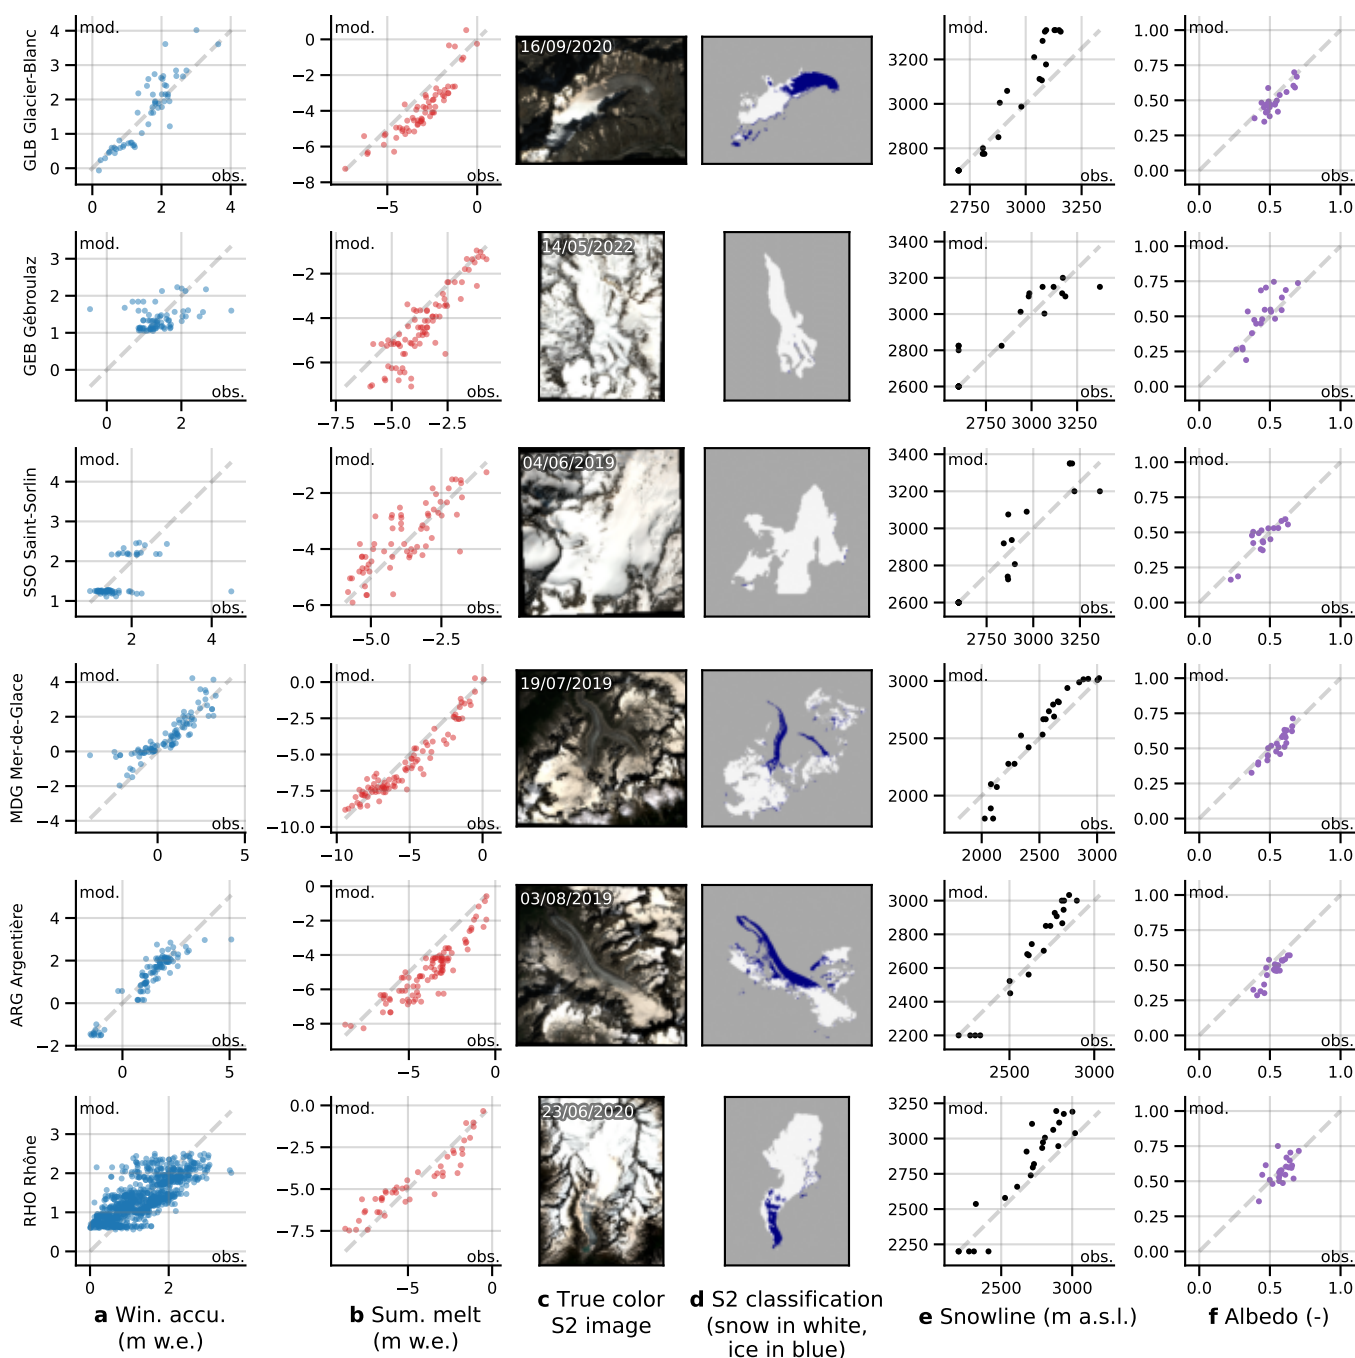

Supplementary Figure 1: **Evaluations of the simulations**, for 6 of the 12 selected glaciers, except for winter accumulation which is used for calibration (see Methods). (a) Winter accumulation, observed using stakes vs. simulated. (b) Summer melt, observed at stakes vs. simulated. (c) Randomly chosen Sentinel-2 (S2) true color image used as an example. (d) S2 classification of the corresponding S2 image (see Methods), snow in white and ice in blue. (e) Snowline elevation for all selected S2 images, observed using S2 classification (see Methods) vs. simulated. (f) Mean observed albedo of snow vs. mean simulated albedo for each S2 image (see Methods). For S2 image, only simulation points without ice exposed in the model and with snow retrieved in the S2 classification are considered. Grey dotted line corresponds to the 1:1 line.

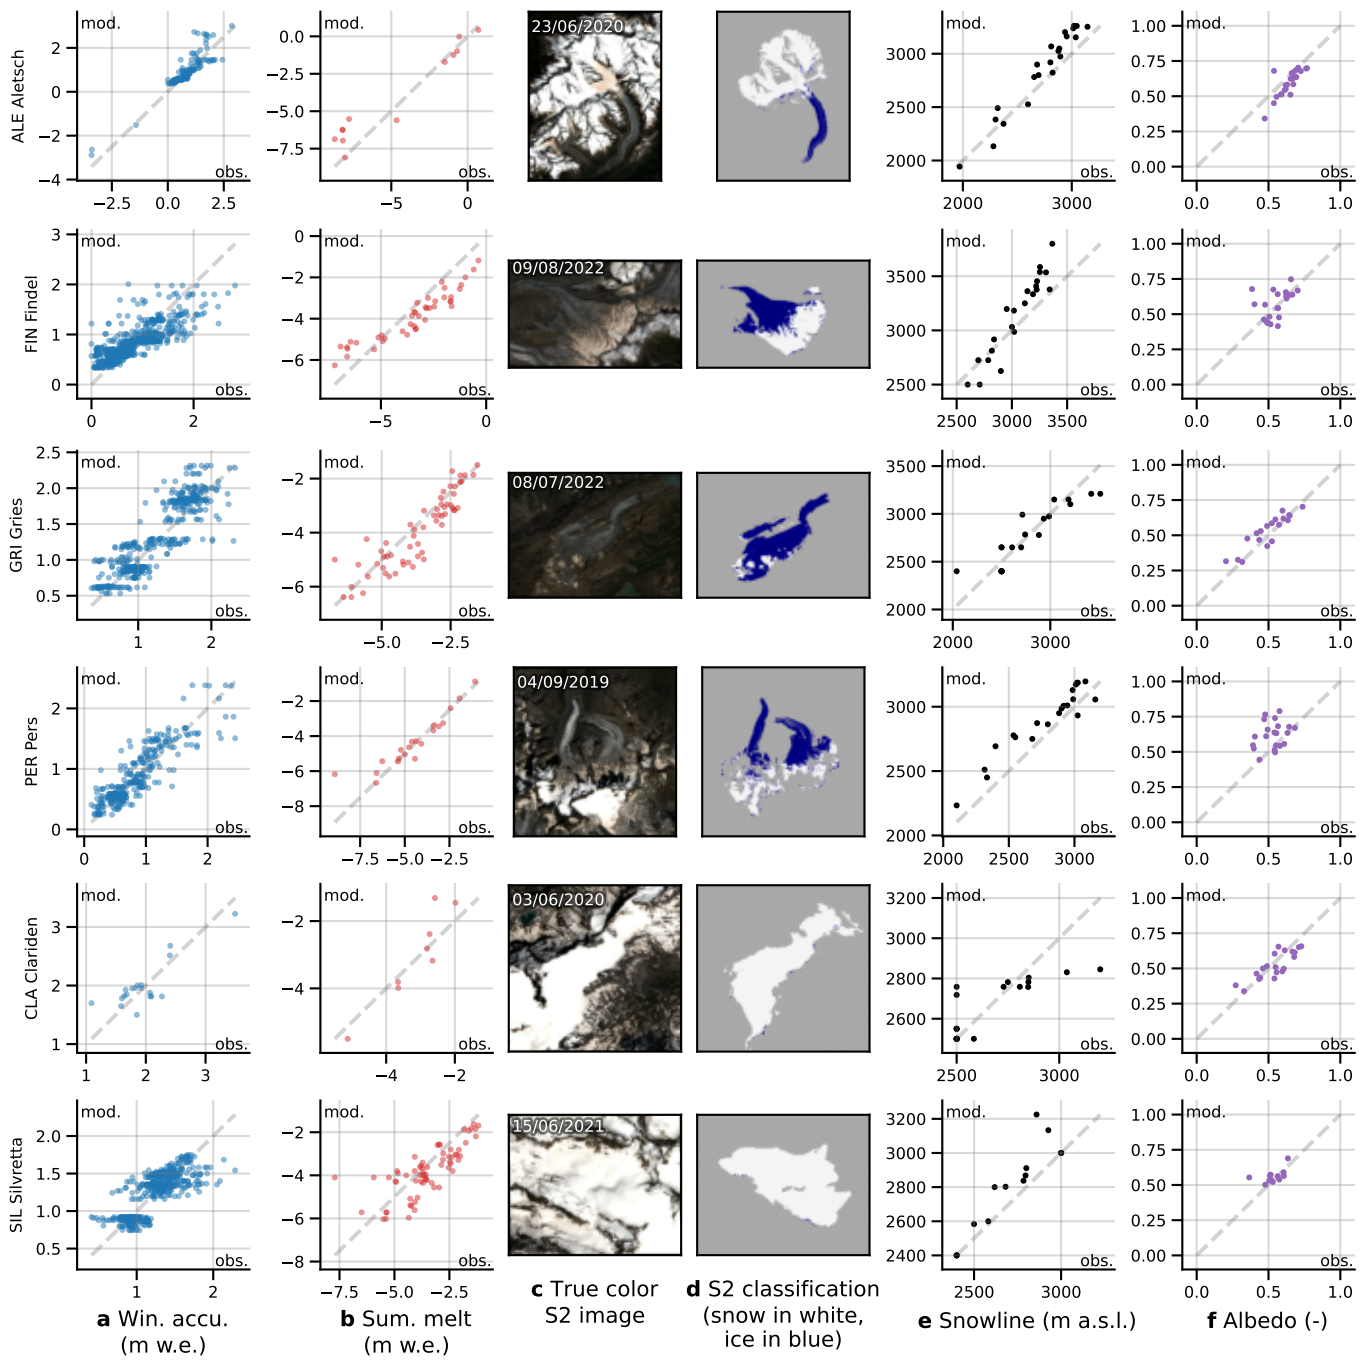

Supplementary Figure 2: **Evaluations of the simulations.** Same as Supp. Fig.1 for the 6 other glaciers.

| Abbr. | Summer melt<br>MAE<br>(m w.e.) | Summer melt<br>RMSE<br>(m w.e.) | Mean snowline<br>elevation<br>MAE (m) | Mean snowline<br>elevation<br>RMSE (m) | Albedo<br>MAE (-) | Albedo<br>RMSE (-) |
|-------|--------------------------------|---------------------------------|---------------------------------------|----------------------------------------|-------------------|--------------------|
| GLB   | 0.99                           | 1.09                            | 98                                    | 131                                    | 0.05              | 0.07               |
| SSO   | 0.64                           | 0.79                            | 69                                    | 99                                     | 0.05              | 0.06               |
| GEB   | 0.81                           | 1.05                            | 74                                    | 109                                    | 0.08              | 0.11               |
| MDG   | 0.67                           | 0.82                            | 112                                   | 138                                    | 0.04              | 0.05               |
| ARG   | 1.13                           | 1.30                            | 97                                    | 112                                    | 0.07              | 0.08               |
| FIN   | 0.81                           | 0.93                            | 164                                   | 197                                    | 0.07              | 0.10               |
| ALE   | 0.99                           | 1.26                            | 146                                   | 164                                    | 0.06              | 0.07               |
| GRI   | 0.50                           | 0.65                            | 122                                   | 153                                    | 0.05              | 0.06               |
| RHO   | 0.81                           | 0.95                            | 140                                   | 173                                    | 0.06              | 0.08               |
| CLA   | 0.44                           | 0.56                            | 79                                    | 126                                    | 0.06              | 0.07               |
| PER   | 0.39                           | 0.71                            | 134                                   | 147                                    | 0.11              | 0.14               |
| SIL   | 0.74                           | 0.92                            | 81                                    | 130                                    | 0.04              | 0.06               |

Supplementary Table 3: **Evaluation metrics of the simulations for each glacier.** Metrics related to Supp. Fig. 1-2. MAE stands for mean absolute error. RMSE stands for root mean square error.

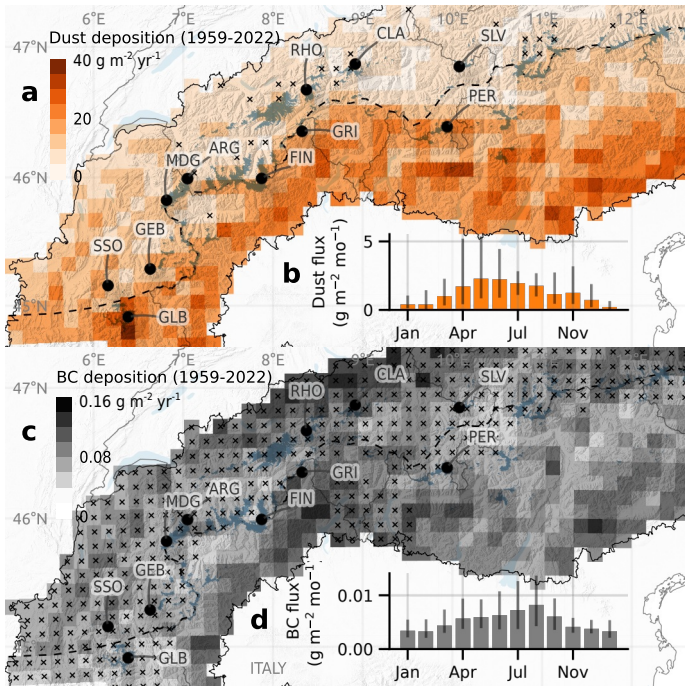

Supplementary Figure 3: **(Extension of Figure 3) Deposition fluxes of LAPs, and illumination of the glaciers.** (a, c) Annual fluxes of (a) dust and (c) BC deposition from ALADIN over the period 1959-2022. (b, d) Monthly average of (b) dust and (d) BC deposition fluxes for the 12 selected glaciers over the period 1959-2022. Bars stands for the mean over the 12 glaciers, and the black lines for the minimum and maximum. Alpine glacier locations are highlighted in blue. Black crosses are drawn where the p-values corresponding to the Pearson, Spearman, and Kendal tests are under 0.05, assessing increasing trends for dust and decreasing trends for BC over the period 1959-2022. This shows a minority of increasing trends for dust depositions, while a majority of the BC depositions are decreasing.

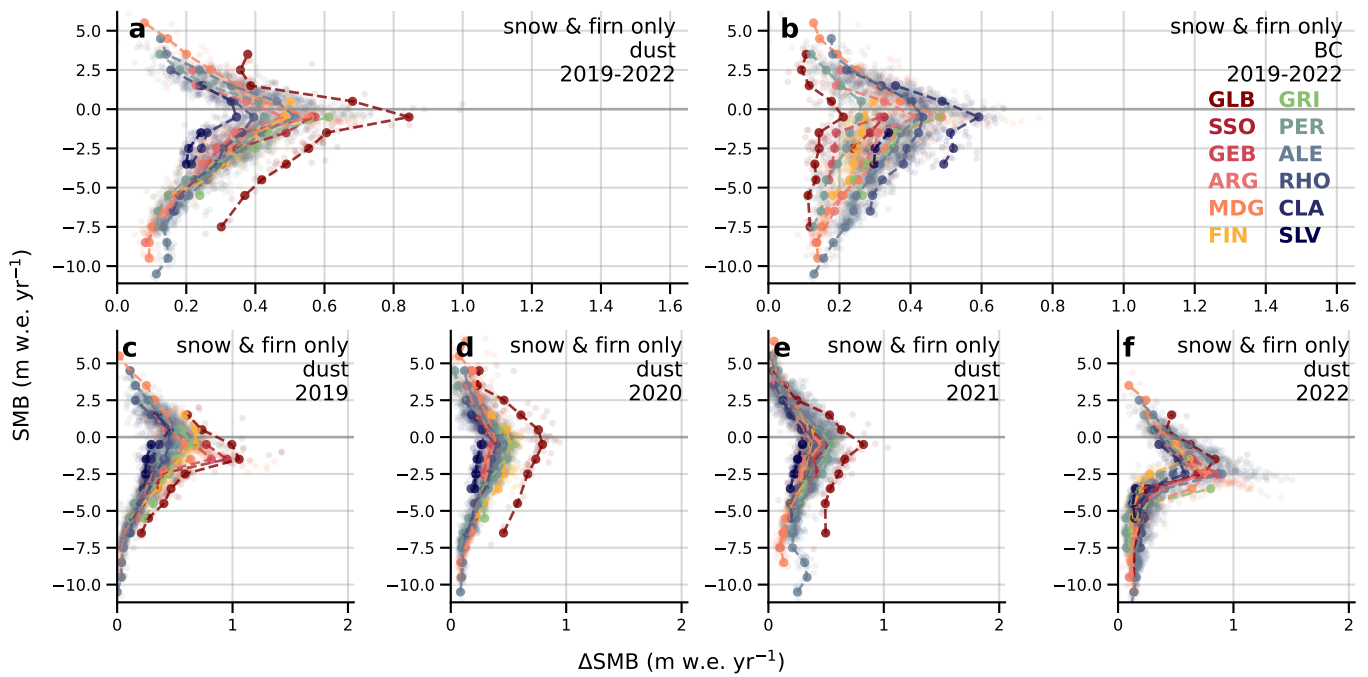

Supplementary Figure 4: **Extension of Figure 3, considering only impacts on snow and firns.** Impacts on snow and firns of (a) dust and (b) BC for period 2019-2022 for the different glaciers aggregated over SMB bins of 1 m w.e. yr<sup>-1</sup>. Bins are plotted if they contain at least 5 simulation points. Compared to Figure 3, the present figure only accounts for the difference in SMB between the simulation with all LAPs and the simulation without dust or BC when either snow or firn are at the surface of both simulations. Thus, the present figure does not account for the albedo feedback on ice.

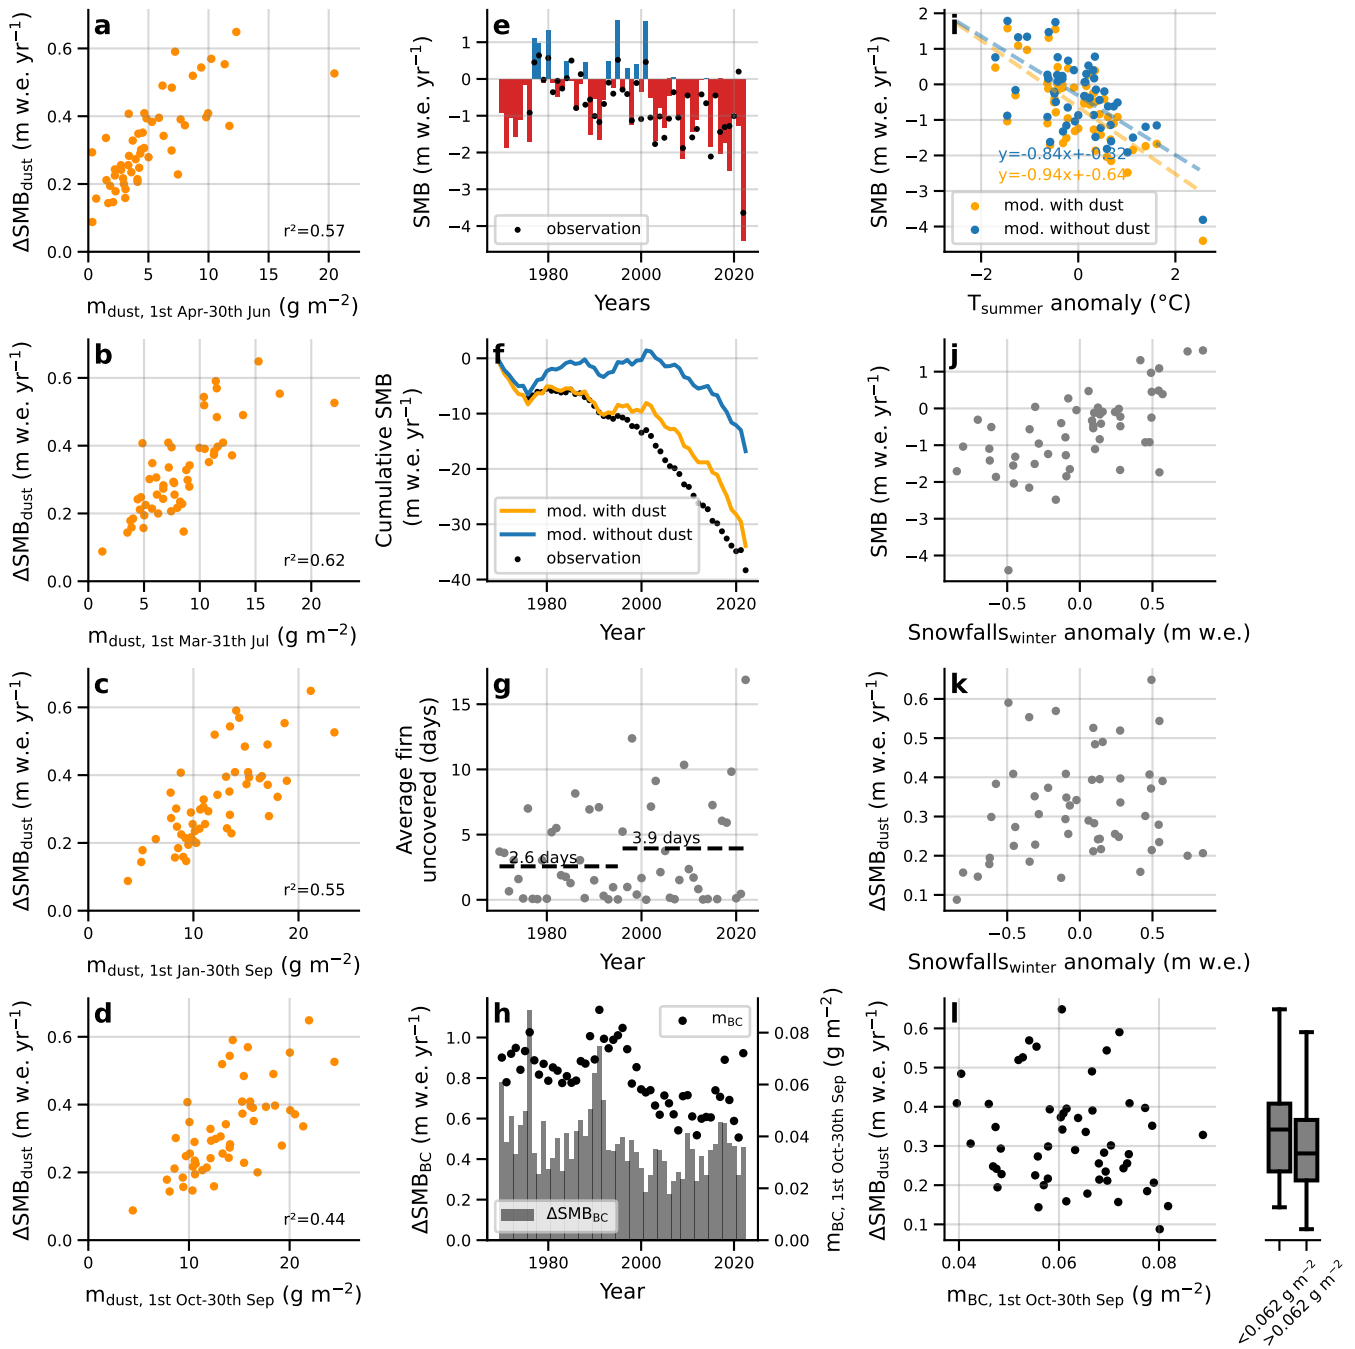

Supplementary Figure 5: **Extension of Figure 4, long-term simulation on the glacier of Argentière (1970-2022)**. (a-d) Relation between the deposited mass of dust from ALADIN over different periods (April-July, March-July, January-September and October-September) and the impact of dust on the SMB. (e) Simulated glacier-wide SMB of Argentière (including both dust and BC). (f) Cumulative glacier-wide SMB of Argentière (dust and BC for the orange line, only BC for the blue line). (g) Simulated glacier-wide time duration of firm at the surface with averages on two periods 1970-1995 and 1996-2022. For example, a value of 10 days can mean that firm covers a quarter of the glacier between 40 days. (h) Evolution of the annual deposition in BC deposited by ALADIN. (i) Summer air temperature anomaly vs. glacier-wide SMB with and without dust. (j) Winter snowfalls anomaly vs. glacier-wide SMB. (k) Winter snowfalls anomaly vs. impact of dust on the SMB due to dust. (l) Annual BC deposition vs. impact of dust on the SMB and associated boxplots of the same values divided into two bins.

## References

- Dussaillant Inés, Hugonnet Romain, Huss Matthias, Berthier Etienne, Bannwart Jacqueline, Paul Frank, Zemp Michael.* Annual mass change of the world's glaciers from 1976 to 2024 by temporal downscaling of satellite data with in situ observations // Earth System Science Data. V 2025. 17, 5. 1977–2006. Publisher: Copernicus GmbH.
- Sommer Christian, Groos Alexander Raphael, Fürst Johannes, Braun Matthias.* Transient snow line altitudes of glaciers in the European Alps from multi-mission remote sensing data (2000&ndash;2025) // Earth System Science Data Discussions. III 2026. 1–39. Publisher: Copernicus GmbH.
